# Supplementary material for: Accelerated construction of an in vitro model of human periodontal ligament tissue: vacuum plasma combined with fibronectin coating and a polydimethylsiloxane matrix
Source: PeerJ journal article supplement (doi:10.7717/peerj.7036), 2019-05-31
Supplement: Fig4_ESCA.zip [file Fig4_ESCA.zip]

# XPS Surface Analysis Result:

20140604 PDMS liao

Date:

2014/06/04

Sample Provider:

Analyst:

Instrument:

PHI X-tool

 **ULVAC-PHI, INC.**

## 1. Overview

### 1.1 Acquisition Overview

This reporting describes the result of survey

### 1.2 Platen Information

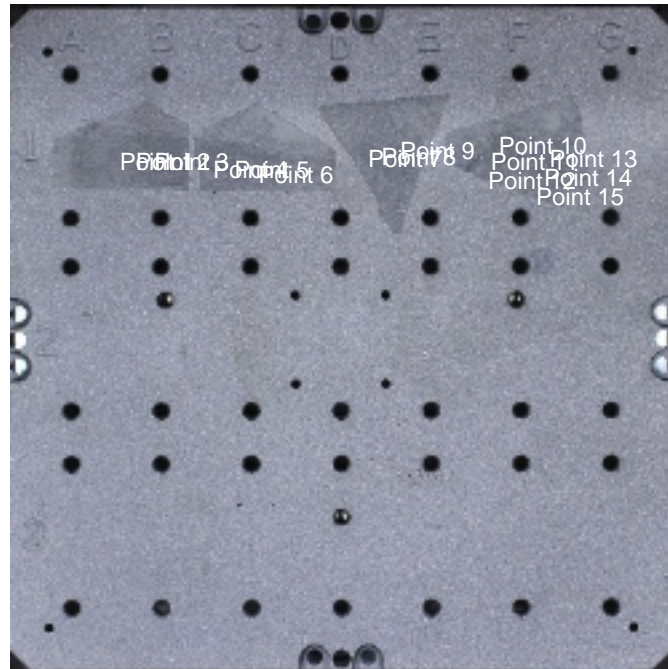

fig. 1.2.1 IntroPhoto

table. 1.2.1 Position Table

| Acquisition Point | Thumbnail Photograph | Description |
|-------------------|----------------------|-------------|
| Point 1           |                      | cont1       |
| Point 2           |                      | cont2       |
| Point 3           |                      | cont3       |
| Point 4           |                      | fibro1      |
| Point 5           |                      | fibro2      |
| Point 6           |                      | fibro3      |
| Point 7           |                      | plas1       |
| Point 8           |                      | plas2       |
| Point 9           |                      | plas3       |

| Acquisition Point | Thumbnail Phtograph                                                               | Description     |
|-------------------|-----------------------------------------------------------------------------------|-----------------|
| Point 10          |  | fibroplasfront1 |
| Point 11          |  | fibroplasfront2 |
| Point 12          |  | fibroplasfront3 |
| Point 13          |  | fibroplasback1  |
| Point 14          |  | fibroplasback2  |
| Point 15          |  | fibroplasback3  |

## 1.3 Acquisition Condition

table. 1.3.1 Survey

|                          |                                              |
|--------------------------|----------------------------------------------|
| Acquisition Point        | Point 1 2 3 4 5 6 7 8<br>9 10 11 12 13 14 15 |
| Instrument               | PHI X-tool                                   |
| Xray Source              | Al Ka                                        |
| Xray Condition           | 15kV 25W                                     |
| Acquisition Area         | 108 $\mu\text{m}$                            |
| Take-Off Angle           | 45 deg.                                      |
| Neutralization Condition | 1.2eV 20.0 $\mu\text{A}$                     |
| Clean Sputtered          | Not Sputter Cleaned                          |

table. 1.3.2 Region

| Name   | Range(eV)        | PassEnergy(eV) | StepSize(eV) | Time(s) |
|--------|------------------|----------------|--------------|---------|
| SURVEY | 1300.00 - 0.00eV | 224.00eV       | 0.800eV      | 20.000s |

table. 1.3.3 Narrow

|                          |                                              |
|--------------------------|----------------------------------------------|
| Acquisition Point        | Point 1 2 3 4 5 6 7 8<br>9 10 11 12 13 14 15 |
| Instrument               | PHI X-tool                                   |
| Xray Source              | Al K $\alpha$                                |
| Xray Condition           | 15kV 5W                                      |
| Acquisition Area         | 19 $\mu$ m                                   |
| Take-Off Angle           | 45 deg.                                      |
| Neutralization Condition | 1.2eV 20.0 $\mu$ A                           |
| Clean Sputtered          | Not Sputter Cleaned                          |

table. 1.3.4 Region

| Name | Range(eV)         | PassEnergy(eV) | StepSize(eV) | Time(s) |
|------|-------------------|----------------|--------------|---------|
| H1s  | 26.00 - 6.00eV    | 55.00eV        | 0.200eV      | 20.000s |
| C1s  | 298.00 - 278.00eV | 280.00eV       | 1.000eV      | 20.000s |
| N1s  | 411.00 - 391.00eV | 280.00eV       | 1.000eV      | 20.000s |
| O1s  | 543.00 - 523.00eV | 280.00eV       | 1.000eV      | 20.000s |
| Si2p | 114.00 - 94.00eV  | 280.00eV       | 1.000eV      | 20.000s |

## 2. Result

### 2.1 Atomic Concentration Table

#### 2.1.1 Survey

Acquisition Point:1

Area Comment:cont1

File Path:20140604\_140102¥20140604 PDMS liao¥14604\_142521.spe

Acquisition Point:2

Area Comment:cont2

File Path:20140604\_140102¥20140604 PDMS liao¥14604\_143038.spe

Acquisition Point:3

Area Comment:cont3

File Path:20140604\_140102¥20140604 PDMS liao¥14604\_143315.spe

Acquisition Point:4

Area Comment:fibro1

File Path:20140604\_140102¥20140604 PDMS liao¥14604\_143707.spe

Acquisition Point:5

Area Comment:fibro2

File Path:20140604\_140102¥20140604 PDMS liao¥14604\_144111.spe

Acquisition Point:6

Area Comment:fibro3

File Path:20140604\_140102¥20140604 PDMS liao¥14604\_144505.spe

Acquisition Point:7

Area Comment:plas1

File Path:20140604\_140102¥20140604 PDMS liao¥14604\_144853.spe

Acquisition Point:8

Area Comment:plas2

File Path:20140604\_140102¥20140604 PDMS liao¥14604\_145258.spe

Acquisition Point:9

Area Comment:plas3

File Path:20140604\_140102¥20140604 PDMS liao¥14604\_145529.spe

Acquisition Point:10

Area Comment:fibroplasfront1

File Path:20140604\_140102¥20140604 PDMS liao¥14604\_145835.spe

Acquisition Point:11

Area Comment:fibroplasfront2

File Path:20140604\_140102¥20140604 PDMS liao¥14604\_150235.spe

Acquisition Point:12

Area Comment:fibroplasfront3

File Path:20140604\_140102¥20140604 PDMS liao¥14604\_150511.spe

Acquisition Point:13

Area Comment:fibroplasback1

File Path:20140604\_140102¥20140604 PDMS liao¥14604\_150859.spe

Acquisition Point:14

Area Comment:fibroplasback2

File Path:20140604\_140102¥20140604 PDMS liao¥14604\_151256.spe

Acquisition Point:15

Area Comment:fibroplasback3

File Path:20140604\_140102¥20140604 PDMS liao¥14604\_151649.spe

| Acquisition Point | C1s(%) | O1s(%) | Si2p(%) | S2p(%) | N1s(%) |
|-------------------|--------|--------|---------|--------|--------|
| 1                 | 30.3   | 45.5   | 24.2    | 0.0    | -      |
| 2                 | 31.7   | 43.4   | 24.9    | -      | -      |
| 3                 | 38.3   | 37.3   | 24.3    | -      | -      |
| 4                 | 40.4   | 36.8   | 22.9    | -      | -      |

| Acquisition Point | C1s(%) | O1s(%) | Si2p(%) | S2p(%) | N1s(%) |
|-------------------|--------|--------|---------|--------|--------|
| 5                 | 45.2   | 32.5   | 19.2    | -      | 3.1    |
| 6                 | 47.2   | 29.6   | 22.2    | -      | 1.0    |
| 7                 | 10.6   | 63.7   | 25.8    | -      | -      |
| 8                 | 14.6   | 60.7   | 24.7    | -      | -      |
| 9                 | 15.2   | 59.4   | 25.4    | -      | -      |
| 10                | 34.5   | 40.4   | 25.1    | -      | -      |
| 11                | 36.8   | 38.0   | 25.2    | -      | -      |
| 12                | 33.3   | 41.5   | 25.3    | -      | -      |
| 13                | 34.7   | 39.2   | 26.0    | -      | -      |
| 14                | 46.5   | 32.7   | 20.8    | -      | -      |
| 15                | 38.4   | 37.0   | 24.6    | -      | -      |

## 2.1.2 Narrow

Acquisition Point:1

Area Comment:cont1

File Path:20140604\_140102¥20140604 PDMS liao¥14604\_142948.spe

Acquisition Point:2

Area Comment:cont2

File Path:20140604\_140102¥20140604 PDMS liao¥14604\_143237.spe

Acquisition Point:3

Area Comment:cont3

File Path:20140604\_140102¥20140604 PDMS liao¥14604\_143622.spe

Acquisition Point:4

Area Comment:fibro1

File Path:20140604\_140102¥20140604 PDMS liao¥14604\_144030.spe

Acquisition Point:5

Area Comment:fibro2

File Path:20140604\_140102¥20140604 PDMS liao¥14604\_144427.spe

Acquisition Point:6

Area Comment:fibro3

File Path:20140604\_140102¥20140604 PDMS liao¥14604\_144812.spe

Acquisition Point:7

Area Comment:plas1

File Path:20140604\_140102¥20140604 PDMS liao¥14604\_145213.spe

Acquisition Point:8

Area Comment:plas2

File Path:20140604\_140102¥20140604 PDMS liao¥14604\_145449.spe

Acquisition Point:9

Area Comment:plas3

File Path:20140604\_140102¥20140604 PDMS liao¥14604\_145757.spe

Acquisition Point:10

Area Comment:fibroplasfront1

File Path:20140604\_140102¥20140604 PDMS liao¥14604\_150156.spe

Acquisition Point:11

Area Comment:fibroplasfront2

File Path:20140604\_140102¥20140604 PDMS liao¥14604\_150433.spe

Acquisition Point:12

Area Comment:fibroplasfront3

File Path:20140604\_140102¥20140604 PDMS liao¥14604\_150820.spe

Acquisition Point:13

Area Comment:fibroplasback1

File Path:20140604\_140102¥20140604 PDMS liao¥14604\_151217.spe

Acquisition Point:14

Area Comment:fibroplasback2

File Path:20140604\_140102¥20140604 PDMS liao¥14604\_151610.spe

Acquisition Point:15

Area Comment:fibroplasback3

File Path:20140604\_140102¥20140604 PDMS liao¥14604\_151956.spe

| Acquisition Point | H1s(%) | C1s(%) | N1s(%) | O1s(%) | Si2p(%) |
|-------------------|--------|--------|--------|--------|---------|
| 1                 | 0.0    | 28.1   | 0.0    | 46.3   | 25.7    |
| 2                 | 99.6   | 0.1    | 0.0    | 0.2    | 0.1     |
| 3                 | 0.0    | 33.5   | 0.7    | 39.5   | 26.2    |
| 4                 | 99.1   | 0.4    | 0.0    | 0.3    | 0.2     |
| 5                 | 0.0    | 52.0   | 0.0    | 27.7   | 20.3    |
| 6                 | 0.0    | 38.8   | 7.2    | 32.0   | 21.9    |
| 7                 | 97.4   | 0.2    | 0.0    | 1.7    | 0.7     |
| 8                 | 94.5   | 0.6    | 0.0    | 3.5    | 1.4     |



| Acquisition Point | H1s(%) | C1s(%) | N1s(%) | O1s(%) | Si2p(%) |
|-------------------|--------|--------|--------|--------|---------|
| 9                 | 0.0    | 12.4   | 0.0    | 64.3   | 23.3    |
| 10                | 0.0    | 34.8   | 2.2    | 37.5   | 25.5    |
| 11                | 99.4   | 0.2    | 0.0    | 0.2    | 0.2     |
| 12                | 99.6   | 0.1    | 0.0    | 0.2    | 0.1     |
| 13                | 99.5   | 0.2    | 0.0    | 0.2    | 0.1     |
| 14                | 99.8   | 0.1    | 0.0    | 0.1    | 0.0     |
| 15                | 0.0    | 36.3   | 0.9    | 38.0   | 24.7    |

## 2.2 Survey

table. 2.2.1 File Table

| Position | File Path                                           |
|----------|-----------------------------------------------------|
| 1        | 20140604_140102¥20140604 PDMS liao¥14604_142521.spe |
| 2        | 20140604_140102¥20140604 PDMS liao¥14604_143038.spe |
| 3        | 20140604_140102¥20140604 PDMS liao¥14604_143315.spe |
| 4        | 20140604_140102¥20140604 PDMS liao¥14604_143707.spe |
| 5        | 20140604_140102¥20140604 PDMS liao¥14604_144111.spe |
| 6        | 20140604_140102¥20140604 PDMS liao¥14604_144505.spe |
| 7        | 20140604_140102¥20140604 PDMS liao¥14604_144853.spe |
| 8        | 20140604_140102¥20140604 PDMS liao¥14604_145258.spe |
| 9        | 20140604_140102¥20140604 PDMS liao¥14604_145529.spe |
| 10       | 20140604_140102¥20140604 PDMS liao¥14604_145835.spe |
| 11       | 20140604_140102¥20140604 PDMS liao¥14604_150235.spe |
| 12       | 20140604_140102¥20140604 PDMS liao¥14604_150511.spe |
| 13       | 20140604_140102¥20140604 PDMS liao¥14604_150859.spe |
| 14       | 20140604_140102¥20140604 PDMS liao¥14604_151256.spe |
| 15       | 20140604_140102¥20140604 PDMS liao¥14604_151649.spe |

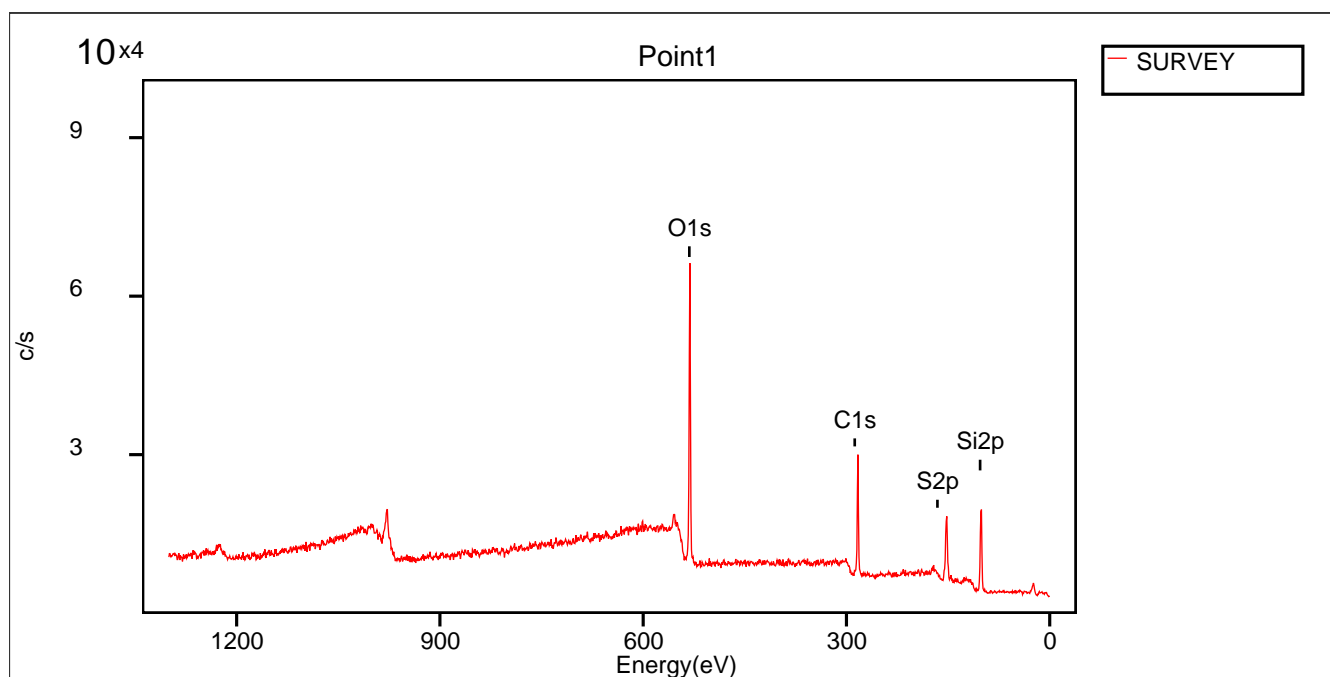

fig. 2.2.1 Survey Point1

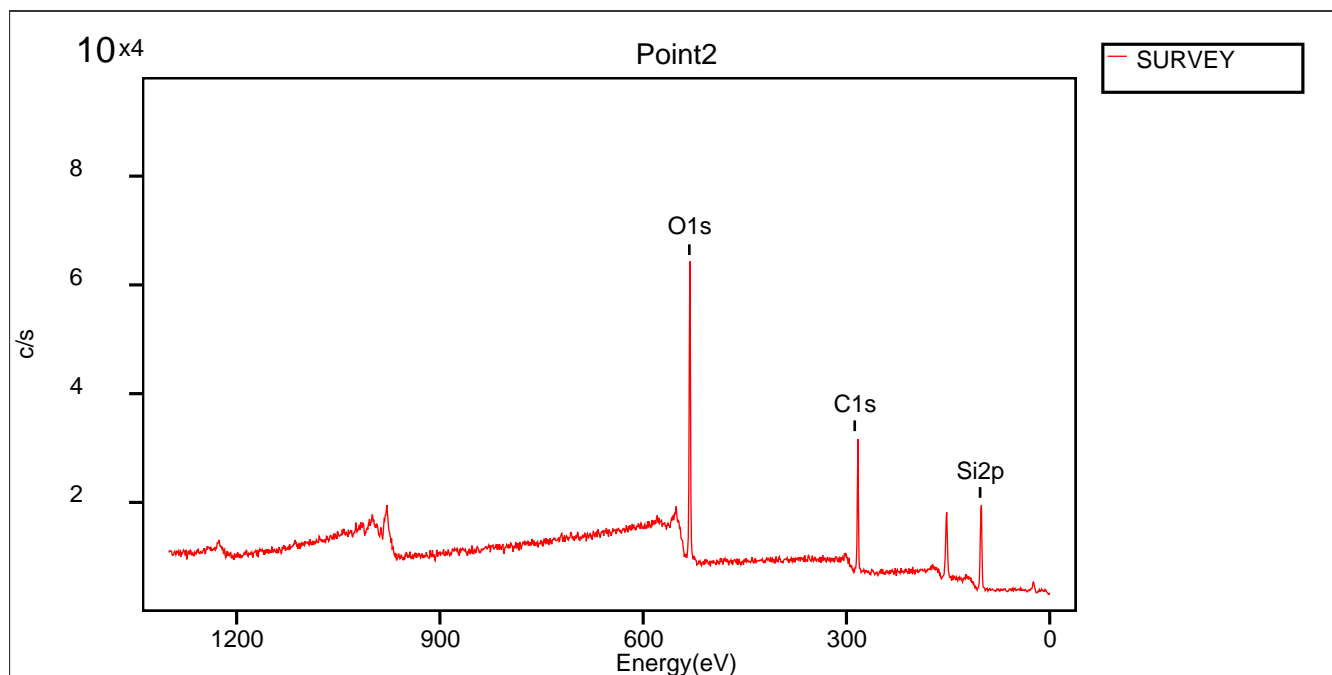

fig. 2.2.2 Survey Point2

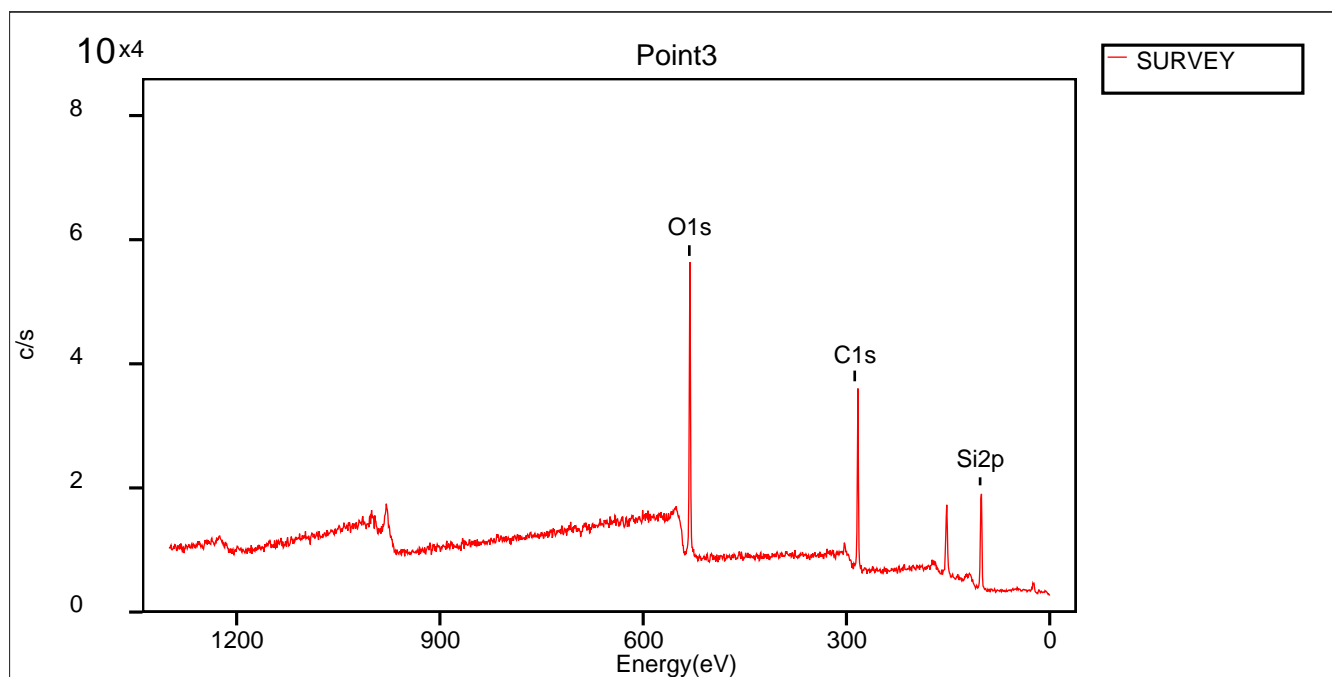

fig. 2.2.3 Survey Point3

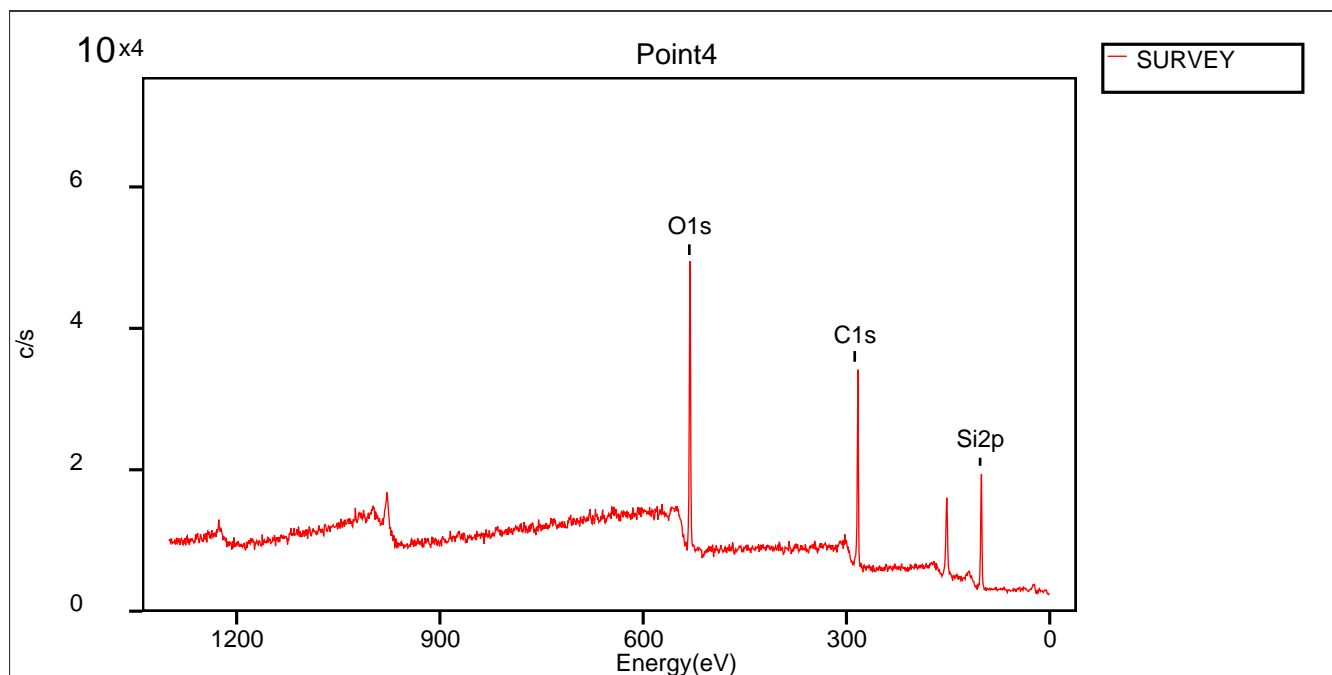

fig. 2.2.4 Survey Point4

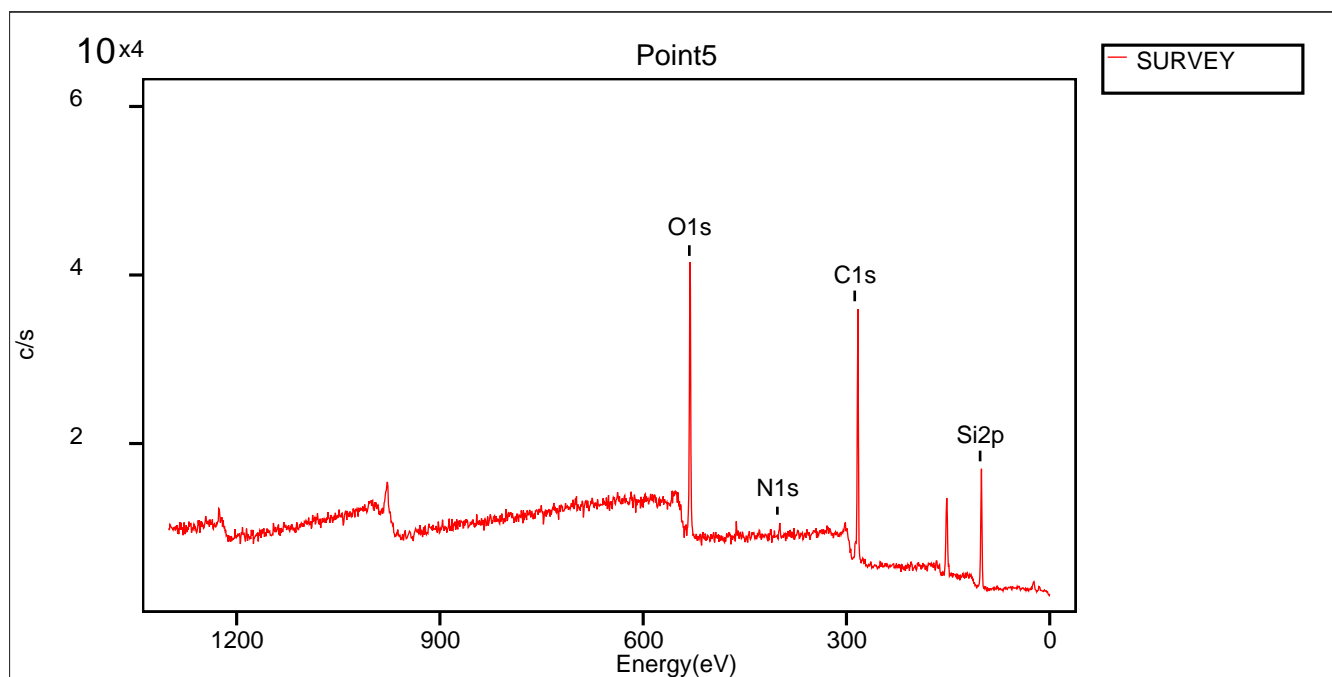

fig. 2.2.5 Survey Point5

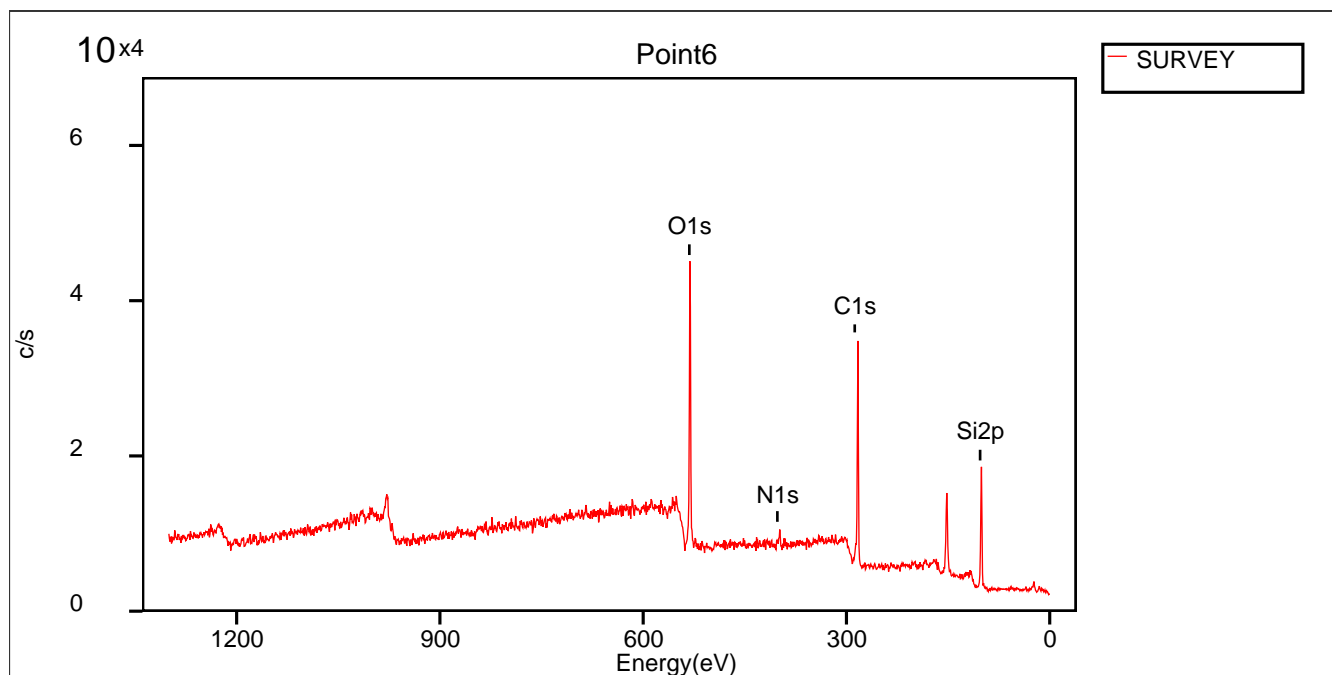

fig. 2.2.6 Survey Point6

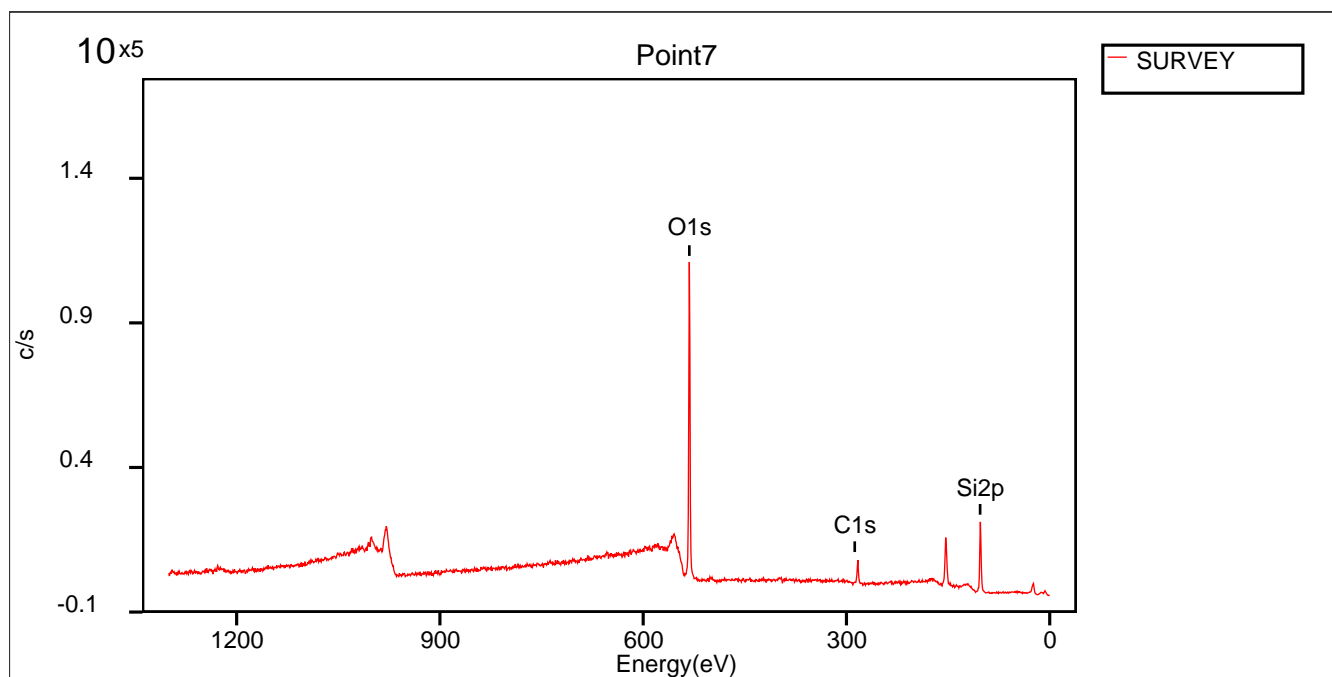

fig. 2.2.7 Survey Point7

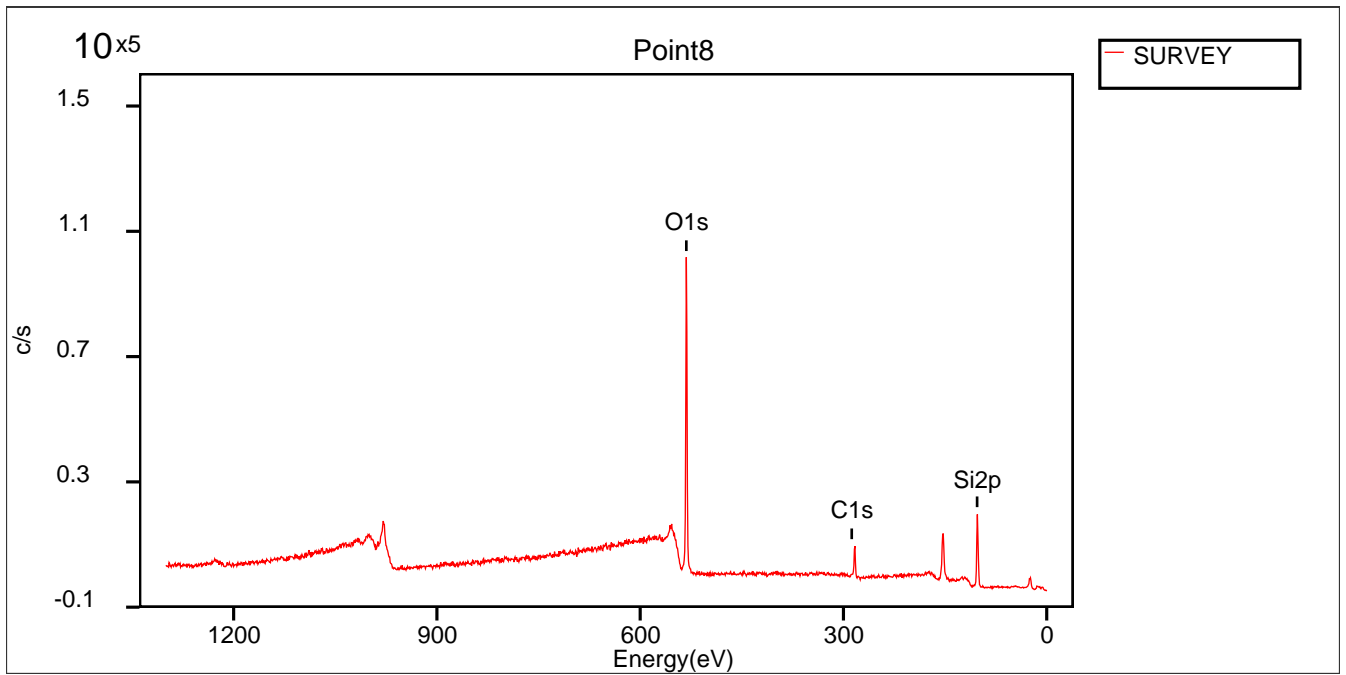

fig. 2.2.8 Survey Point8

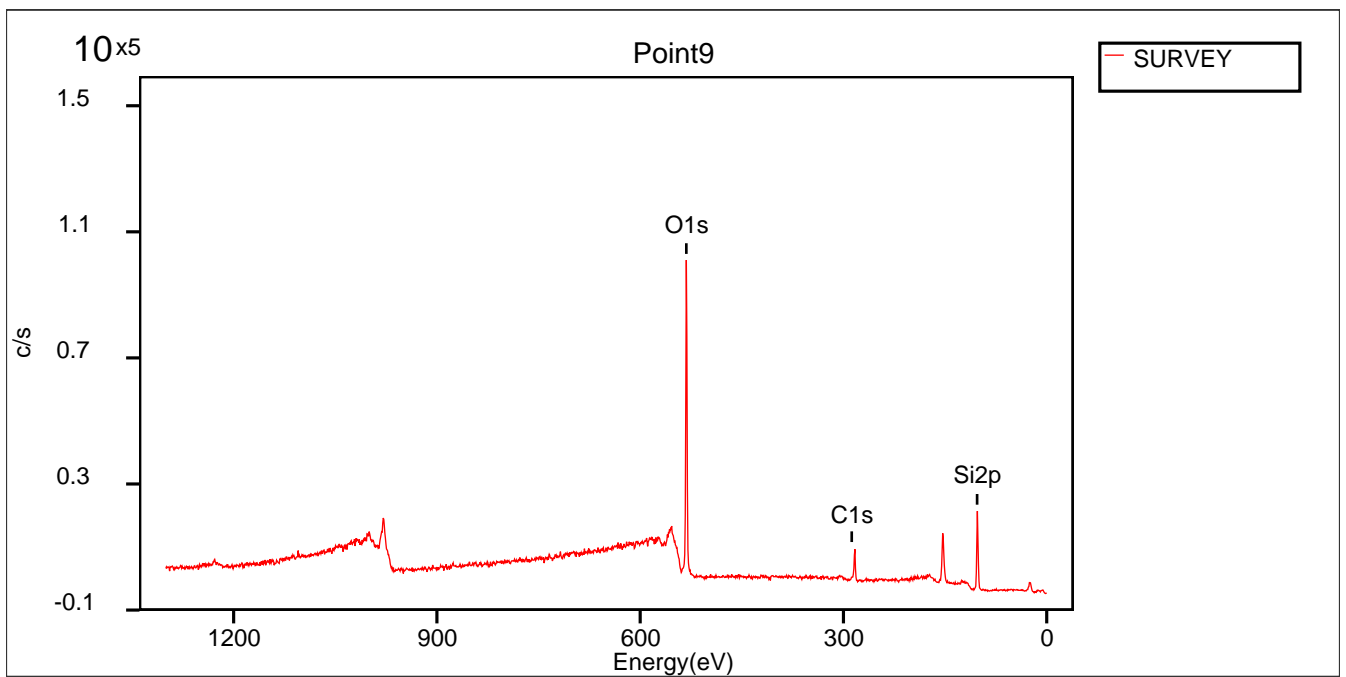

fig. 2.2.9 Survey Point9

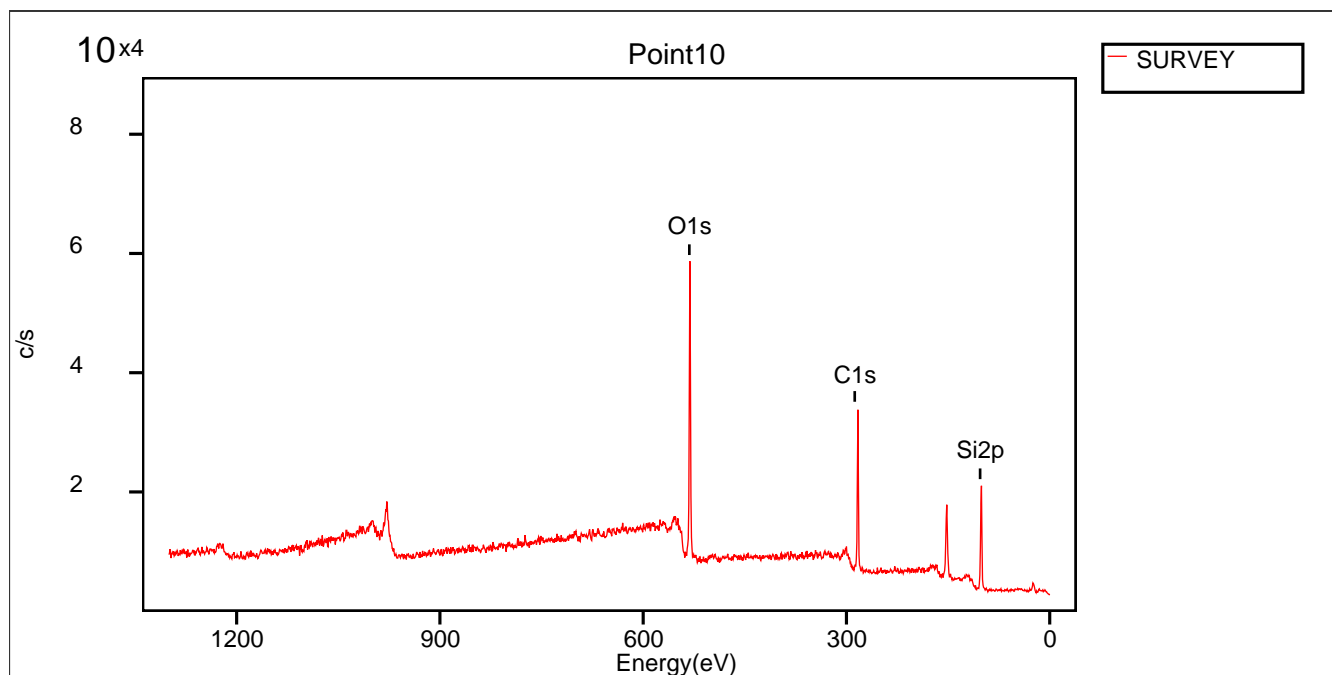

fig. 2.2.10 Survey Point10

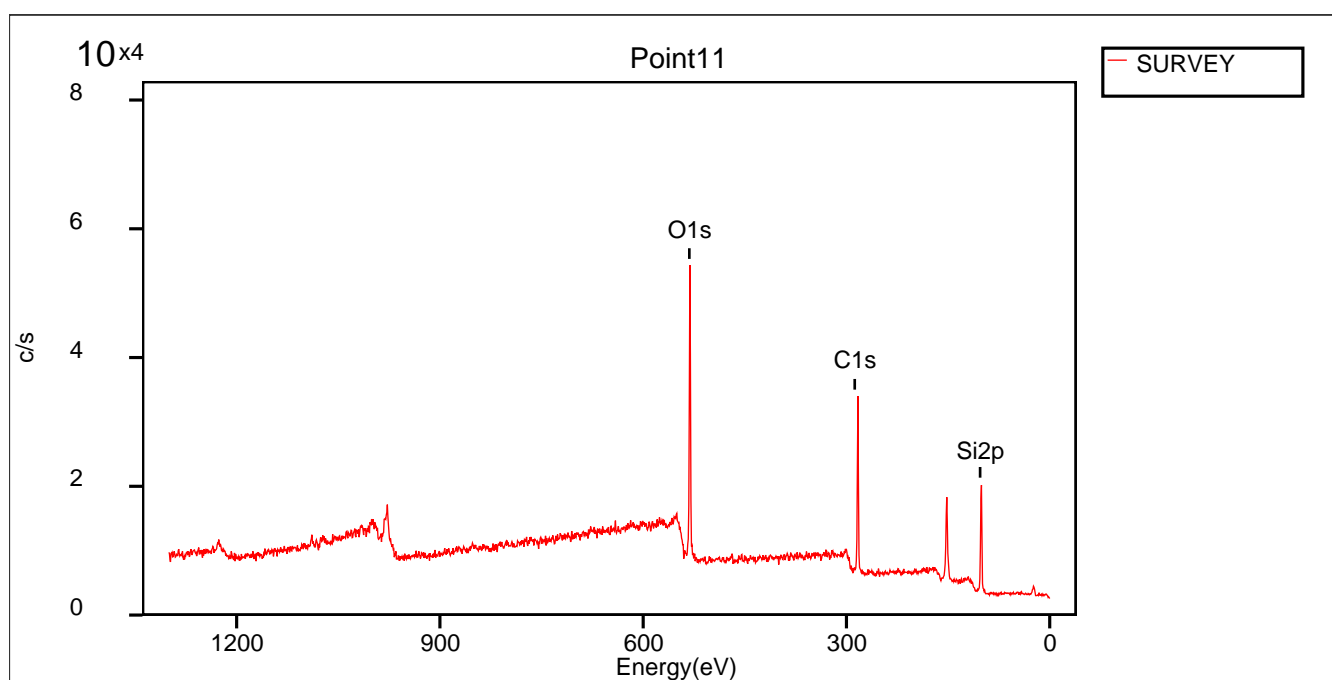

fig. 2.2.11 Survey Point11

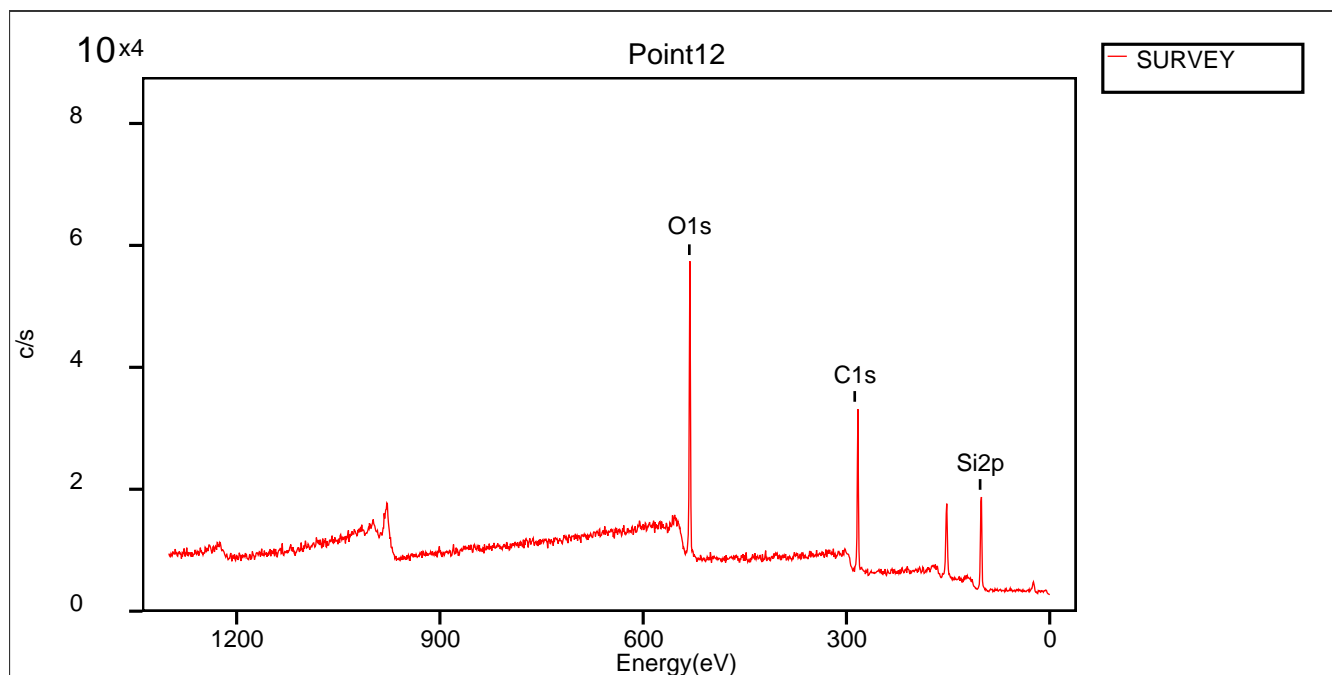

fig. 2.2.12 Survey Point12

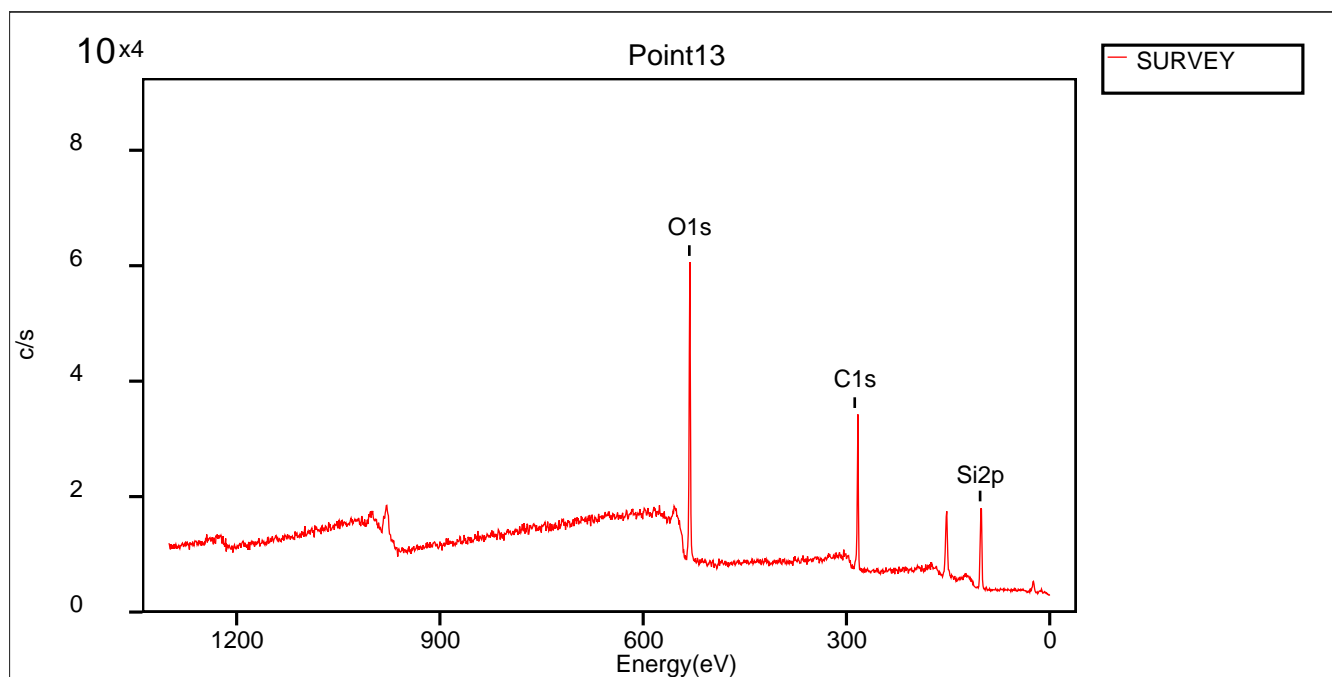

fig. 2.2.13 Survey Point13



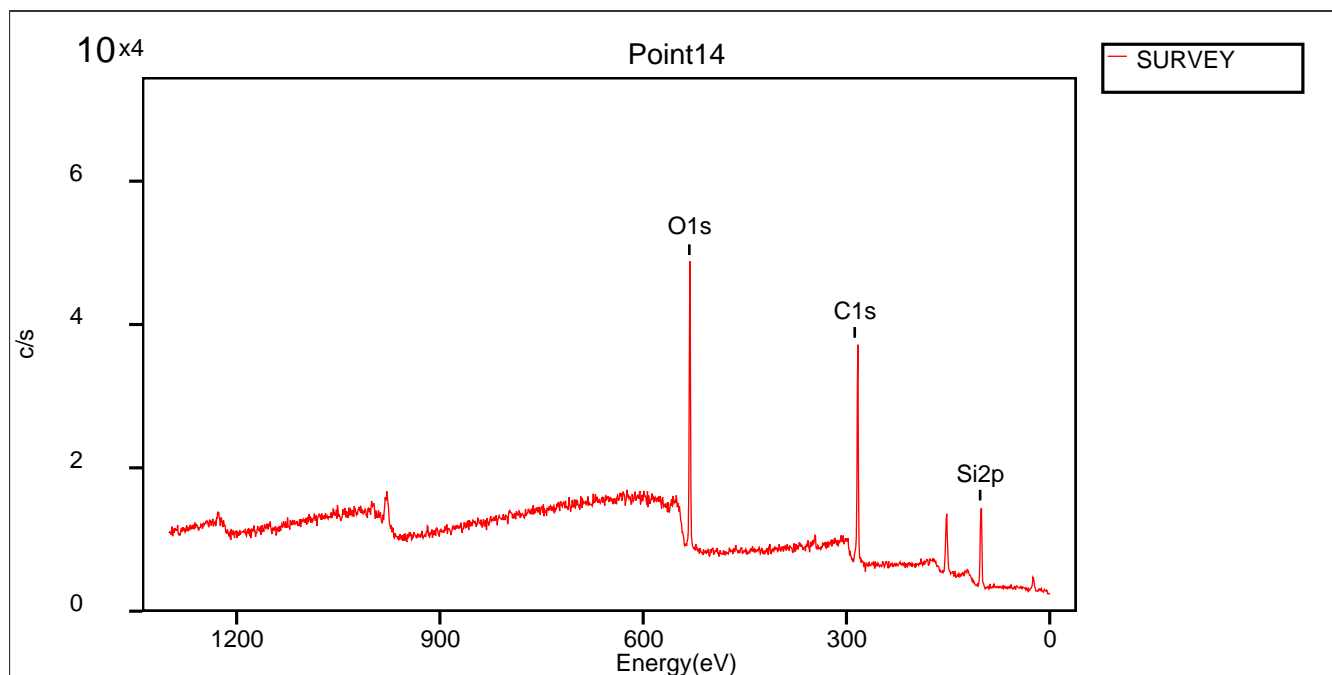

fig. 2.2.14 Survey Point14

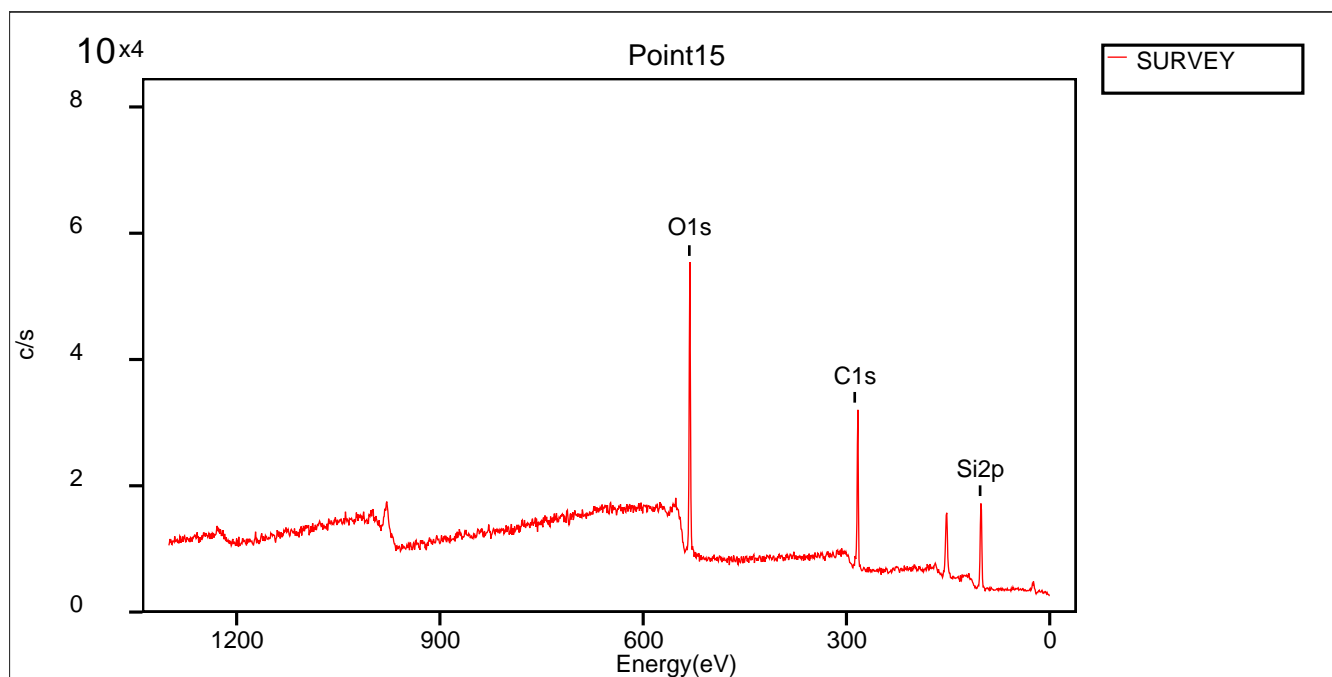

fig. 2.2.15 Survey Point15

## 2.3 Narrow

table. 2.3.1 File Table

| Position | File Path                                           |
|----------|-----------------------------------------------------|
| 1        | 20140604_140102¥20140604 PDMS liao¥14604_142948.spe |
| 2        | 20140604_140102¥20140604 PDMS liao¥14604_143237.spe |
| 3        | 20140604_140102¥20140604 PDMS liao¥14604_143622.spe |
| 4        | 20140604_140102¥20140604 PDMS liao¥14604_144030.spe |
| 5        | 20140604_140102¥20140604 PDMS liao¥14604_144427.spe |
| 6        | 20140604_140102¥20140604 PDMS liao¥14604_144812.spe |
| 7        | 20140604_140102¥20140604 PDMS liao¥14604_145213.spe |
| 8        | 20140604_140102¥20140604 PDMS liao¥14604_145449.spe |
| 9        | 20140604_140102¥20140604 PDMS liao¥14604_145757.spe |
| 10       | 20140604_140102¥20140604 PDMS liao¥14604_150156.spe |
| 11       | 20140604_140102¥20140604 PDMS liao¥14604_150433.spe |
| 12       | 20140604_140102¥20140604 PDMS liao¥14604_150820.spe |
| 13       | 20140604_140102¥20140604 PDMS liao¥14604_151217.spe |
| 14       | 20140604_140102¥20140604 PDMS liao¥14604_151610.spe |
| 15       | 20140604_140102¥20140604 PDMS liao¥14604_151956.spe |

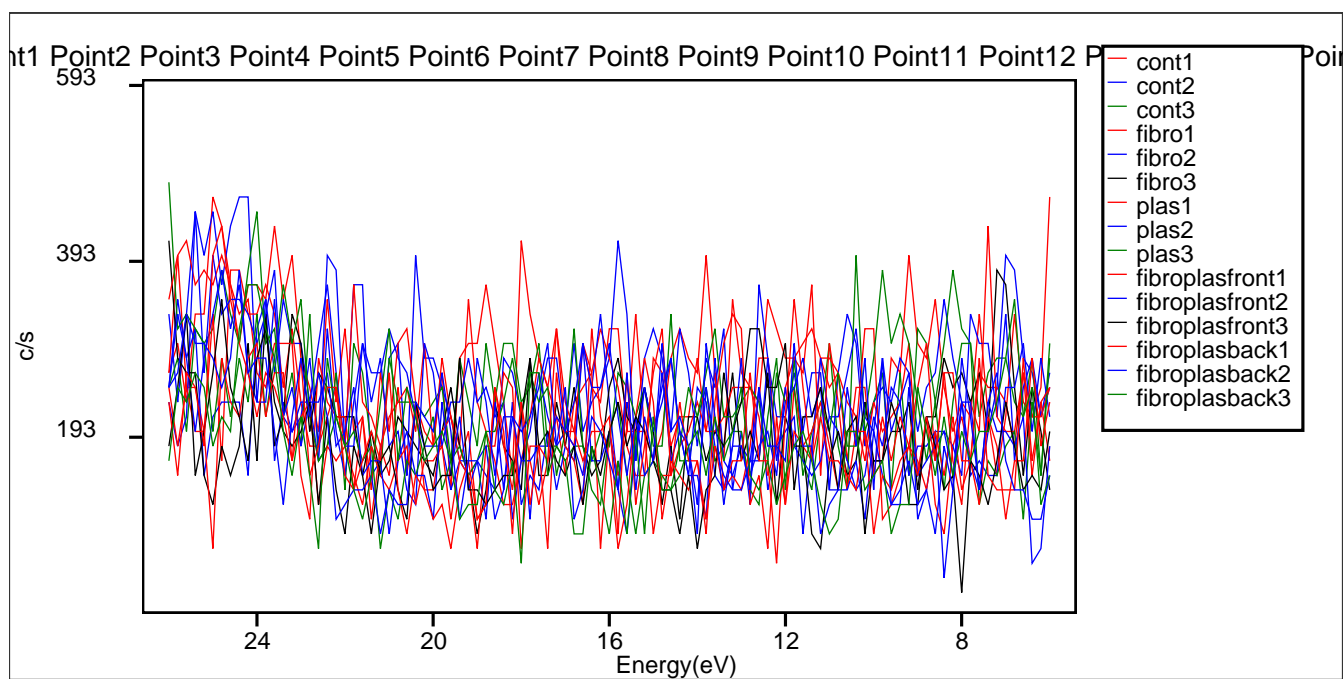

fig. 2.3.1 H1s

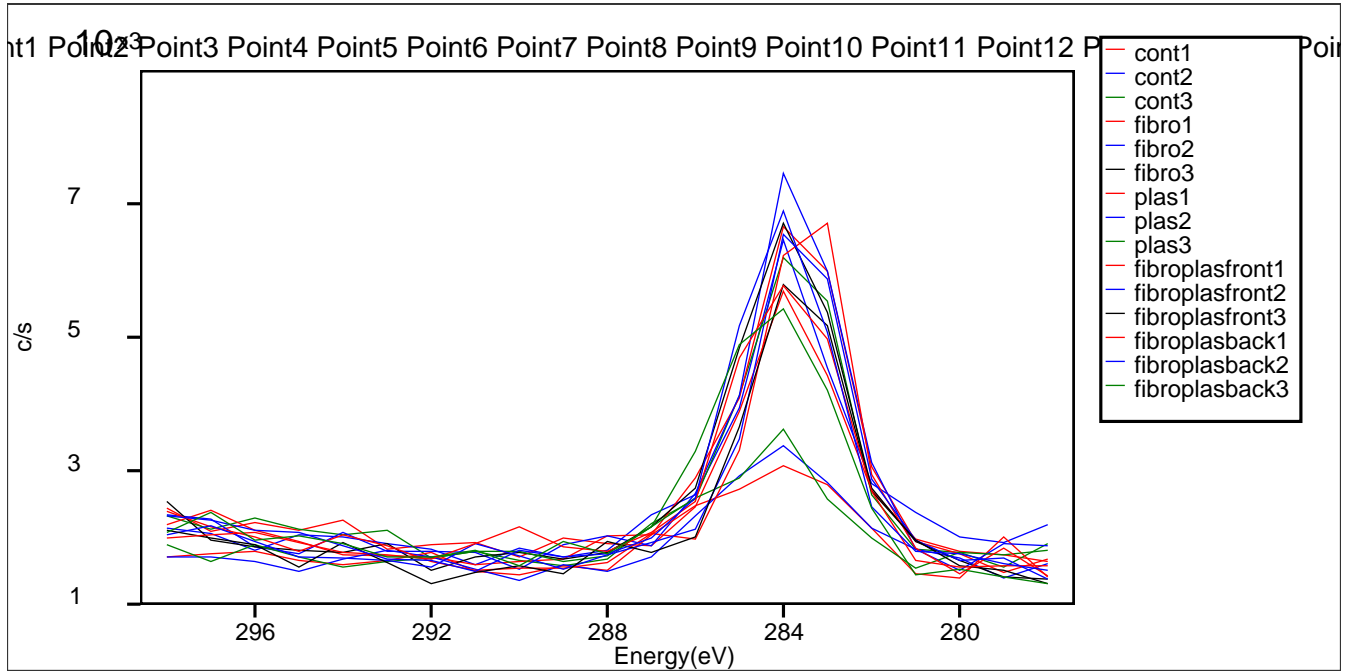

fig. 2.3.2 C1s

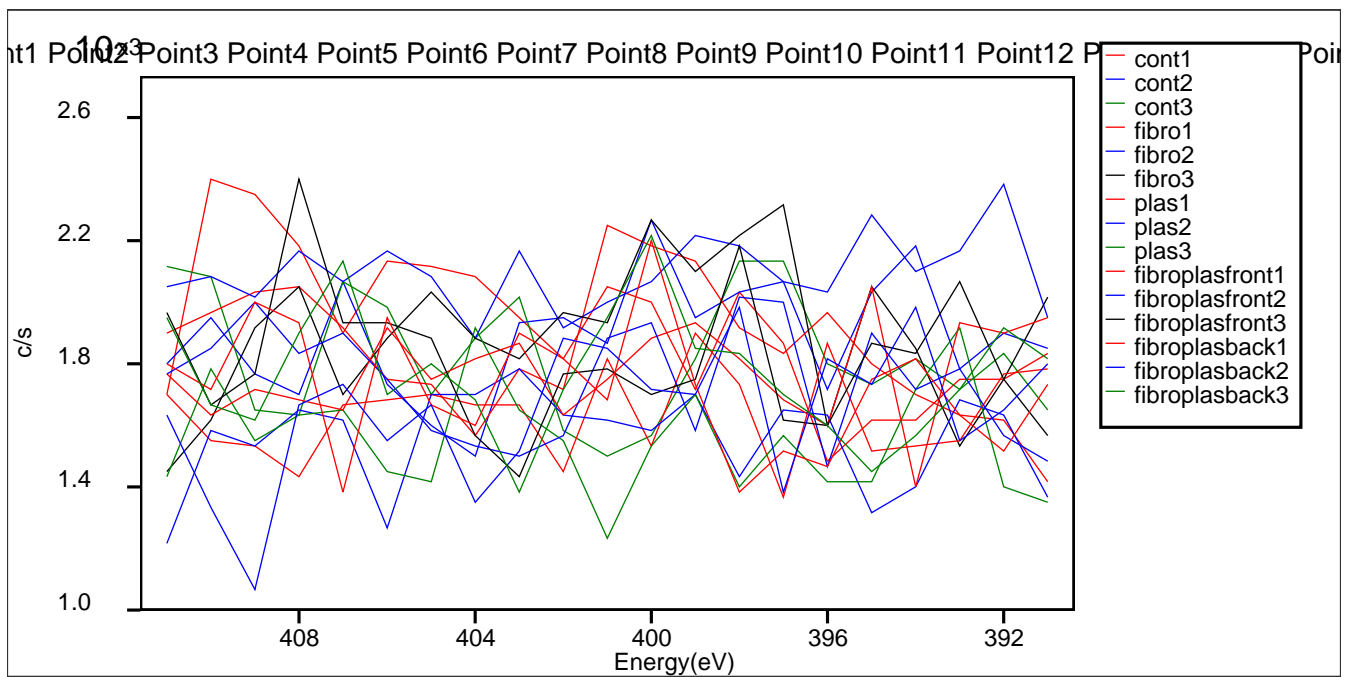

fig. 2.3.3 N1s

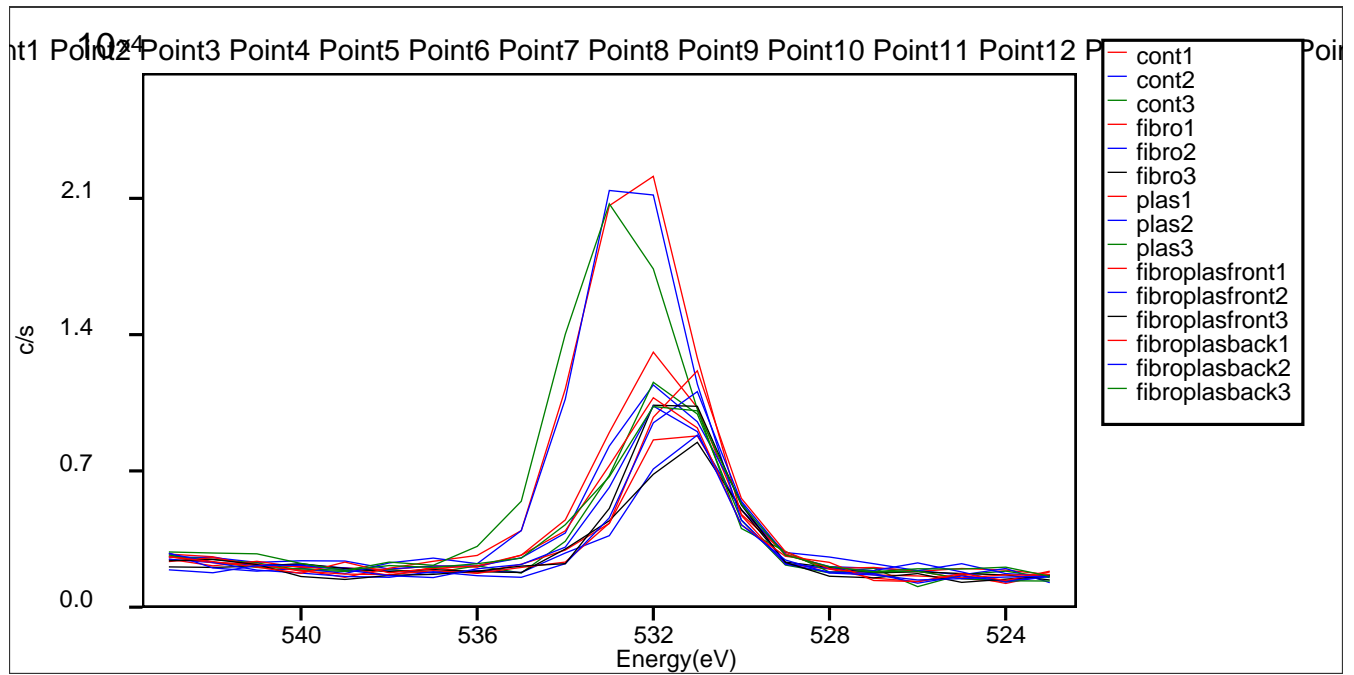

fig. 2.3.4 O1s

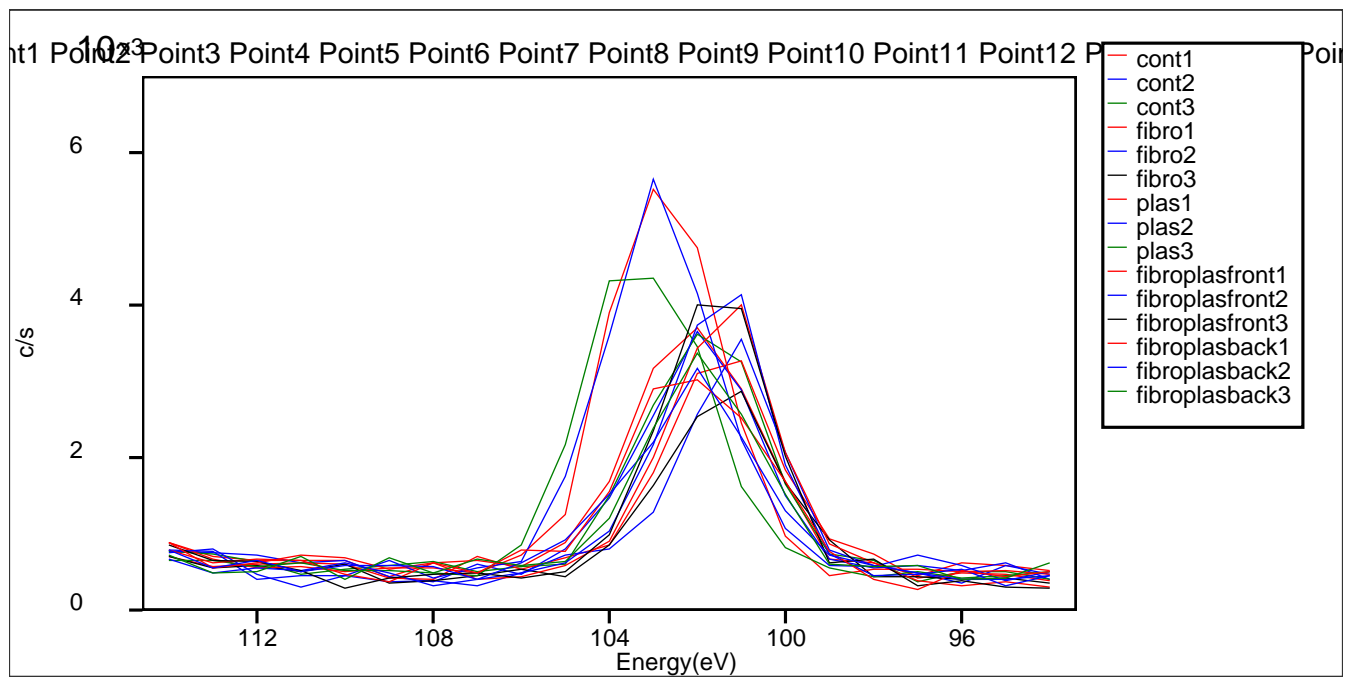

fig. 2.3.5 Si2p

### 3. Memo
